# Supplementary material
Source: publisher figshare collection journal article supplement (https://springernature.figshare.com/articles/dataset/_/22572715)
Supplement: Supplementary file 1 [file 1]

## Sheet: fig2a
Correct	Error
-1.00022	-2.70055
-1.28542	1.81327
-1.028	-3.22994
-0.919648	-0.507204
1.3429	-0.376028
2.35841	-6.53943
1.20489	-1.45226
-0.0350897	-1.6555
0.968416	-1.27009
1.51756	-0.80923
-0.52676	5.98826
-0.870855	5.7951
1.11398	5.41381
1.17574	4.15986
0.890713	-4.11175
-0.171767	-2.62267
0.374983	3.48457
1.43147	4.7167
0.817711	-0.181461
2.59126	-0.0096568
3.57084	-0.17972
-1.32166	-2.48959
0.060624	NaN
-0.727921	NaN
1.43383	NaN
1.09184	NaN
-0.0990729	NaN
2.19729	NaN
2.19727	NaN
1.77995	NaN
0.205584	NaN
0.54607	NaN
-0.0200065	NaN
-0.909462	NaN
-0.195745	NaN
-0.391486	NaN
1.78874	NaN
0.103376	NaN
-1.02661	NaN
0.133987	NaN
-0.683911	NaN
0.0929112	NaN
-0.878014	NaN
0.0470328	-7.0959
0.795989	-2.57148
2.17962	1.51696
3.80888	4.28403
-1.36414	0.550818
0.453985	-0.740836
3.03204	0.119085
0.0938064	0.531405
-0.492019	2.22296
1.37782	-1.00649
0.242258	-1.6763
2.96466	-3.07046
-1.12517	2.48276
0.395488	-3.3707
2.2057	1.69751
-2.14057	-6.47487
0.287606	-0.147724
-0.0891931	-1.35696
1.2819	0.267154
1.04684	-2.93129
-2.85584	-3.5093
-1.45361	-2.39982
-0.237626	-0.403362
-0.108097	-1.55696
0.155134	0.981633
-1.28662	-0.83992
-0.271429	1.51748
1.08862	1.39494
0.549749	2.62176
0.233526	1.36833
-1.5035	-1.27821
-1.05663	-2.12548
0.358561	-0.772817
-0.219429	1.91883
-0.92534	0.446392
-1.22576	-0.879442
0.317201	1.11952
0.590139	-1.18565
-0.0766545	-0.0362941
0.812303	3.31795
-2.83425	0.156904
3.20308	2.40332
1.54869	1.08498
0.540208	1.12309
0.644036	-0.375503
0.535629	1.00956
2.3376	-0.621735
-0.60565	0.998523
1.80386	3.12143
-0.0428467	1.9696
0.23399	2.4579
-0.297359	-0.0504701
1.59035	1.34109
0.0811719	-2.12212
0.915675	1.47292
0.759363	0.394343
2.06842	-0.804916
2.29234	3.20998
-3.19057	-9.40352
1.32157	-1.32507
-0.745305	-2.06823
-1.87991	-1.63171
6.14757	1.59746
0.843652	-2.9878
-1.28894	4.08495
1.22412	2.72978
-0.164795	-0.748323
0.634771	-0.0670319
0.15702	0.515077
-0.730452	-0.157545
-0.88215	-3.51994
-0.63969	-7.06607
2.01457	-2.92625
-1.88123	-3.6402
-1.88101	4.92398
1.40244	2.60414
1.55555	2.56469
1.34237	1.41424
2.51311	1.4799
2.03895	-1.29799
2.66635	0.494701
1.80901	1.03038
0.372554	-0.935352
0.363855	-3.47972
1.4715	0.264093
0.169762	9.21074
2.98988	0.604238
0.631982	-2.92294
-1.23988	-1.33725
2.65813	0.5164
-0.607333	-3.36661
0.916291	-5.43599
0.937106	-1.51879
6.74148	5.64349
0.162346	-1.04213
-0.601469	-1.15275
-0.158303	-0.792671
24.5736	-1.39516
-0.461486	-11.9094
-0.344868	-0.508869
0.640804	0.463735
0.320359	3.81159

## Sheet: fig2c
-0.517537
0.529543
0.325494
-0.490289
-1.20575
0.78626
-1.15889
0.323069
-0.737289
-2.36404
-0.968103
-1.35497
0.79805
0.7093
0.112122
0.118741
0.137102
0.413617
-0.23302
0.3424
0.974265
-1.04973
0.684145
0.774005
-1.65648
-0.305479
-0.47508
1.75591
-0.161866
-0.17927
-1.73932
-1.65118
-1.51486
-1.8955
-1.66481
-1.04475
1.0502
-1.10262
0.567032
-1.59347
-0.0422443
-1.361
1.99411
-1.74261
0.0195495
-0.113896
-0.0663874
-0.485033
1.10256
0.425841
0.983967
0.612909
0.291176
0.349039
-0.580993
0.193612
0.461759
-0.14062
-0.902061
-0.0504615
0.365015
-0.177632
1.80722
-0.980311
-1.41892
0.673124
1.607
1.10918
-1.15026
-1.59677
0.0290349
0.101053
1.24009
-1.30326
-0.100306
-1.39952
1.71859
1.16373
-0.475866
0.67553
-0.444553
0.0256124
-1.29386
0.732705
0.833109
0.778731
0.830923
-0.548932
-1.98542
-0.193232
-1.18393
0.0204272
0.631684
1.03351
1.36644
0.868193
-0.679416
-0.0183595
-1.36099
1.37042
-0.258144
0.313551
0.778601
-0.615587
-1.3985
1.34551
0.958039
-1.26537
-0.138016
-0.490726
0.828078
0.675459
0.663106
-1.00177
-0.297229
1.2941
2.05043
-0.255552
-0.378682
-0.549702
-2.22865
-1.01358
-0.758194
-1.04731
0.0427693
-0.524921
-3.15515
-0.692545
0.866709
-1.31241
-0.595
0.438971
0.192101
-1.39248
0.648459
-0.0843141
-2.26414
-1.31318
-0.267571
1.02925
-0.729963
-1.32308
-1.68224
0.680966
-1.42374
